# Supplementary material for: Cage compound Sc5Pt24B12: a Pt-stuffed variant of filled skutterudite structure. Electronic and structural properties
Source: Royal Society of Chemistry journal article supplement (doi:10.1039/d3dt02825a), 2023-12-01
Supplement: d3dt02825a9.pdf [file d3dt02825a9.pdf]

$P4_2/m-32/n$

origin 0 0 0

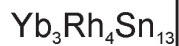

$t_2$

$a, b, c$

$P2/m-3$

origin 0 0 0

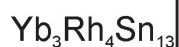

|         |         |         |          |
|---------|---------|---------|----------|
| Sn1: 2a | Yb1: 6c | Rh1: 8e | Sn2: 24k |
| 0       | 1/4     | 1/4     | 0        |
| 0       | 0       | 1/4     | y=0.15   |
| 0       | 1/2     | 1/4     | z=0.31   |

|          |          |         |         |           |           |
|----------|----------|---------|---------|-----------|-----------|
| Sn1a: 1a | Sn1b: 1b | Yb1: 6f | Rh1: 8i | Sn2a: 12j | Sn2b: 12k |
| 0        | 1/2      | x=0.25  | x=0.25  | 0         | 1/2       |
| 0        | 1/2      | 0       | x       | y=0.15    | y=0.19    |
| 0        | 1/2      | 1/2     | x       | z=0.31    | z=0.35    |

$I2/m-3$

origin 0 0 0

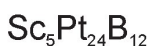

$k_2$

$a, b, c$

$P2/m-3$

origin 0 0 0

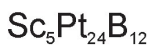

|         |         |           |           |         |
|---------|---------|-----------|-----------|---------|
| Sc1: 2a | Sc2: 8c | Pt1: 24g  | Pt2: 24g  | B1: 24g |
| 0       | 1/4     | 0         | 0         | 0       |
| 0       | 1/4     | y=0.23490 | y=0.36477 | y=0.153 |
| 0       | 1/4     | z=0.13163 | z=0.37152 | z=0.333 |

|          |          |          |           |           |           |           |           |           |
|----------|----------|----------|-----------|-----------|-----------|-----------|-----------|-----------|
| Sc1a: 1a | Sc1b: 1b | Sc2: 8i  | Pt1a: 12j | Pt1b: 12k | Pt2a: 12j | Pt2b: 12k | B1a: 12j  | B1b: 12k  |
| 0        | 1/2      | x=0.2500 | 0         | 1/2       | 0         | 1/2       | 0         | 1/2       |
| 0        | 1/2      | x        | y=0.23490 | y=0.26510 | y=0.36477 | y=0.13523 | y=0.15300 | y=0.34700 |
| 0        | 1/2      | x        | z=0.13163 | z=0.36837 | z=0.37152 | z=0.12848 | z=0.33300 | z=0.16700 |
