# Supplementary figures and images for: Cage compound Sc5Pt24B12: a Pt-stuffed variant of filled skutterudite structure. Electronic and structural properties
Source: Royal Society of Chemistry journal article supplement (doi:10.1039/d3dt02825a), 2023-12-01

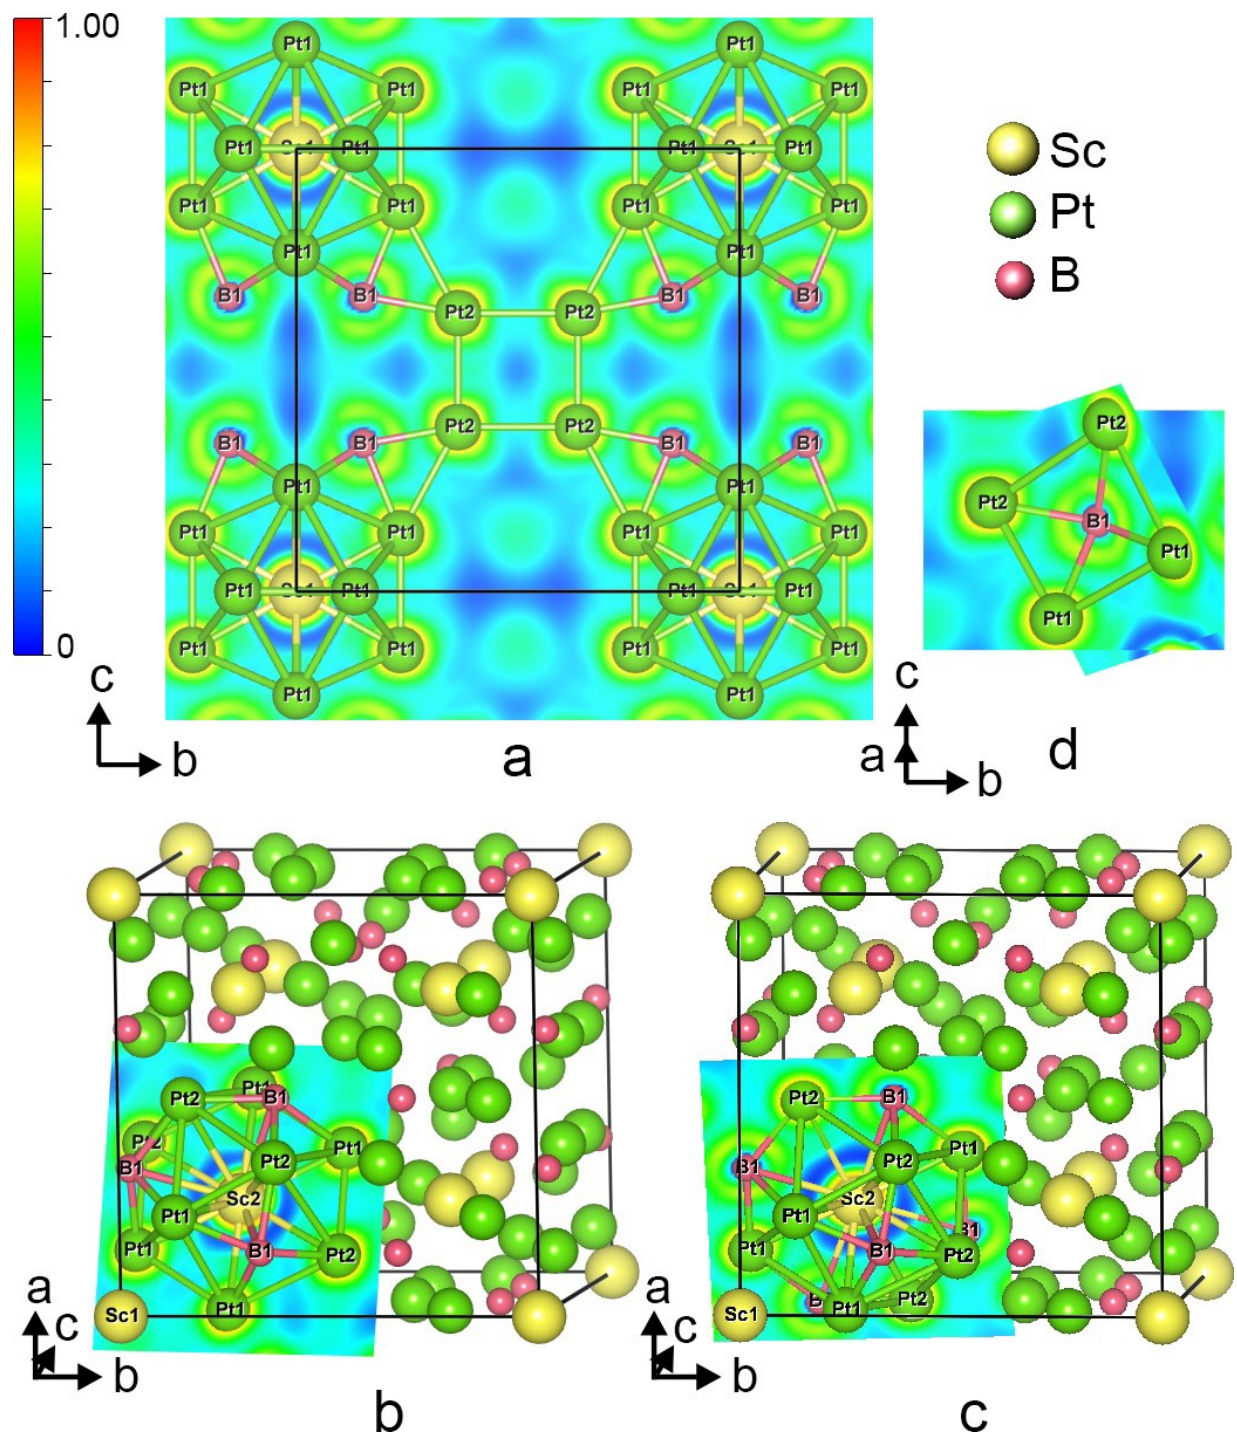

Supplement: d3dt02825a10.pdf [file d3dt02825a10.pdf]

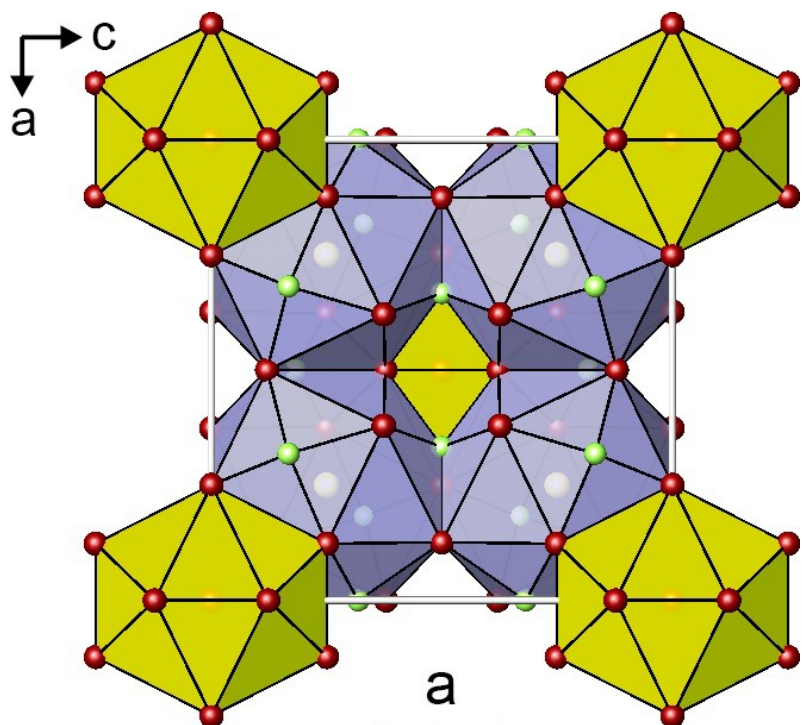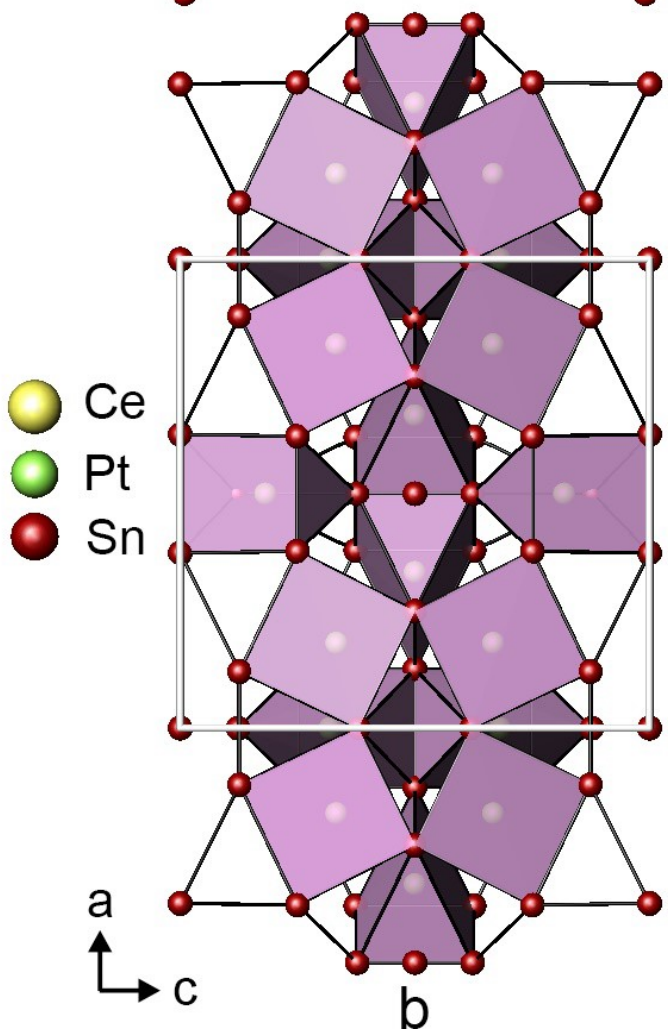

Supplement: d3dt02825a3.pdf [file d3dt02825a3.pdf]

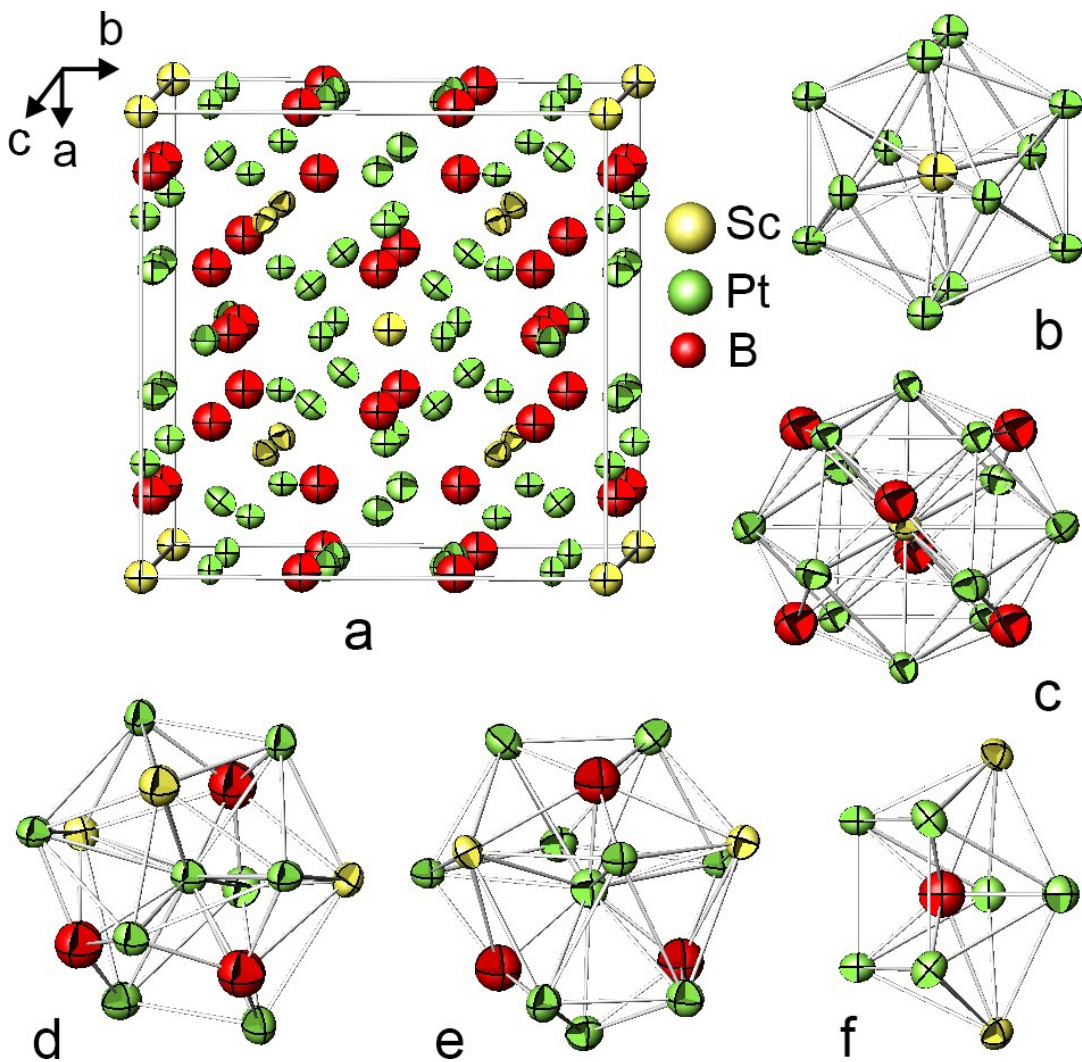

Supplement: d3dt02825a5.pdf [file d3dt02825a5.pdf]

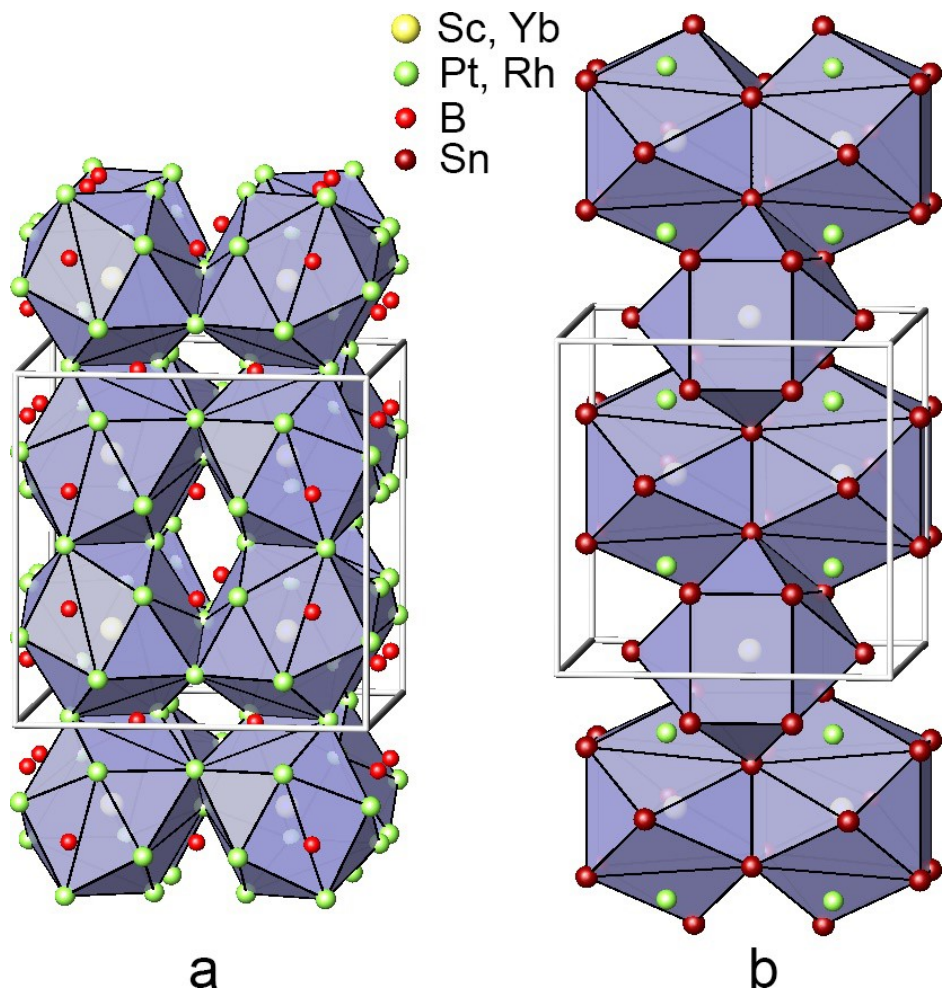

Supplement: d3dt02825a7.pdf [file d3dt02825a7.pdf]

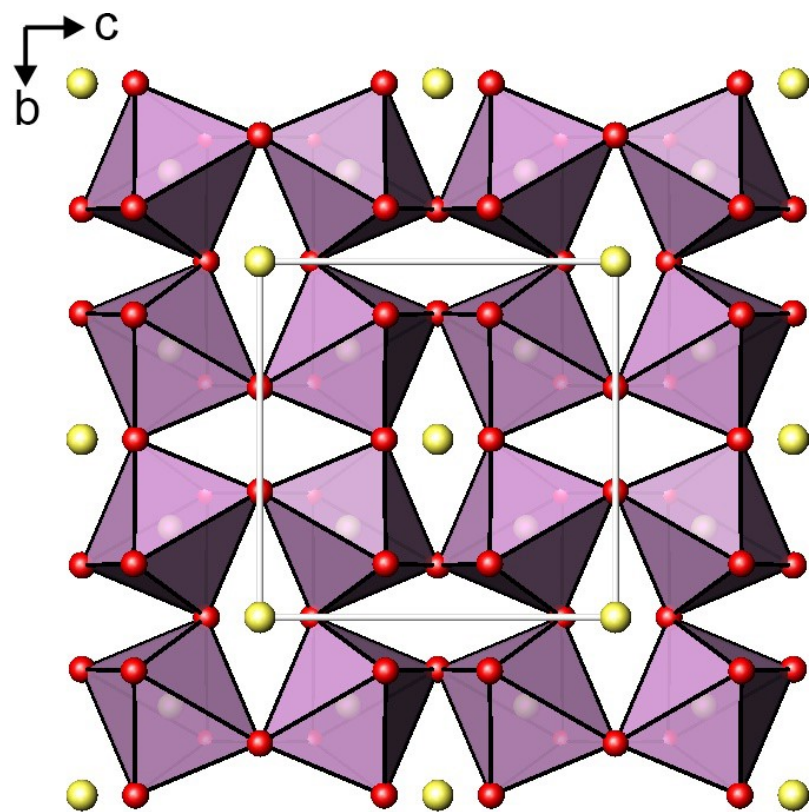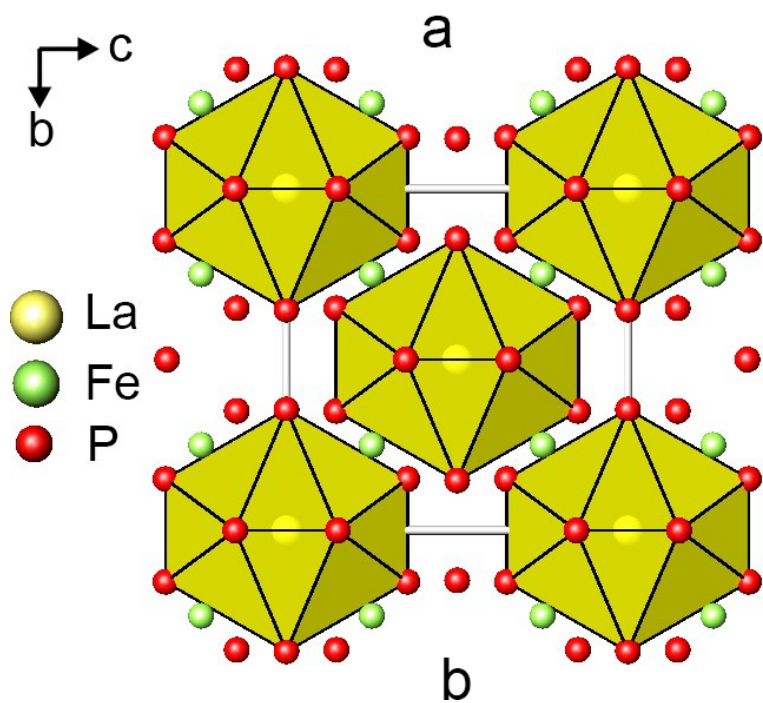

Supplement: d3dt02825a8.pdf [file d3dt02825a8.pdf]
